# Supplementary material for: RNA from a simple-tandem repeat is required for sperm maturation and male fertility in Drosophila melanogaster
Source: eLife journal article supplement (doi:10.7554/elife.48940), 2019-11-05
Supplement: supp [file elife-48940-supp-v1.zip]

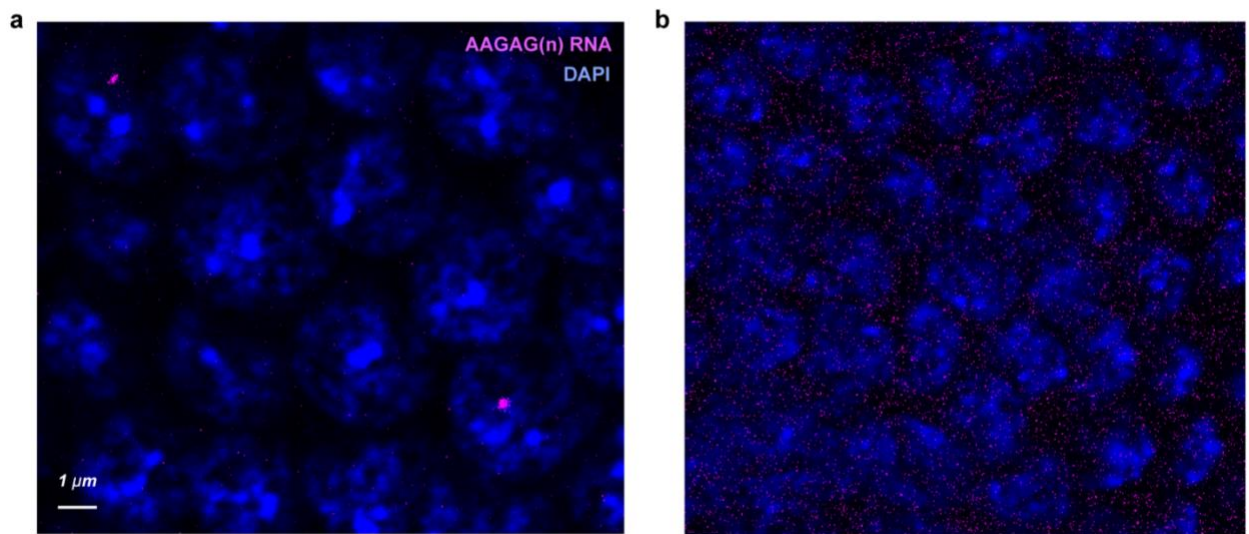

**Figure 1-figure supplement 5. AAGAG RNA-FISH localizes RNA and not DNA.** Confocal sections of cycle 14 nuclei treated with either **a**, RNaseH or **b**, RNaseIII after AAGAG RNA probe (magenta) hybridization. A higher laser intensity for the AAGAG probe channel was used in **b** to demonstrate abolishment of AAGAG signal.
