# Supplementary material for: RNA from a simple-tandem repeat is required for sperm maturation and male fertility in Drosophila melanogaster
Source: eLife journal article supplement (doi:10.7554/elife.48940), 2019-11-05
Supplement: supp [file elife-48940-supp-v1.zip]

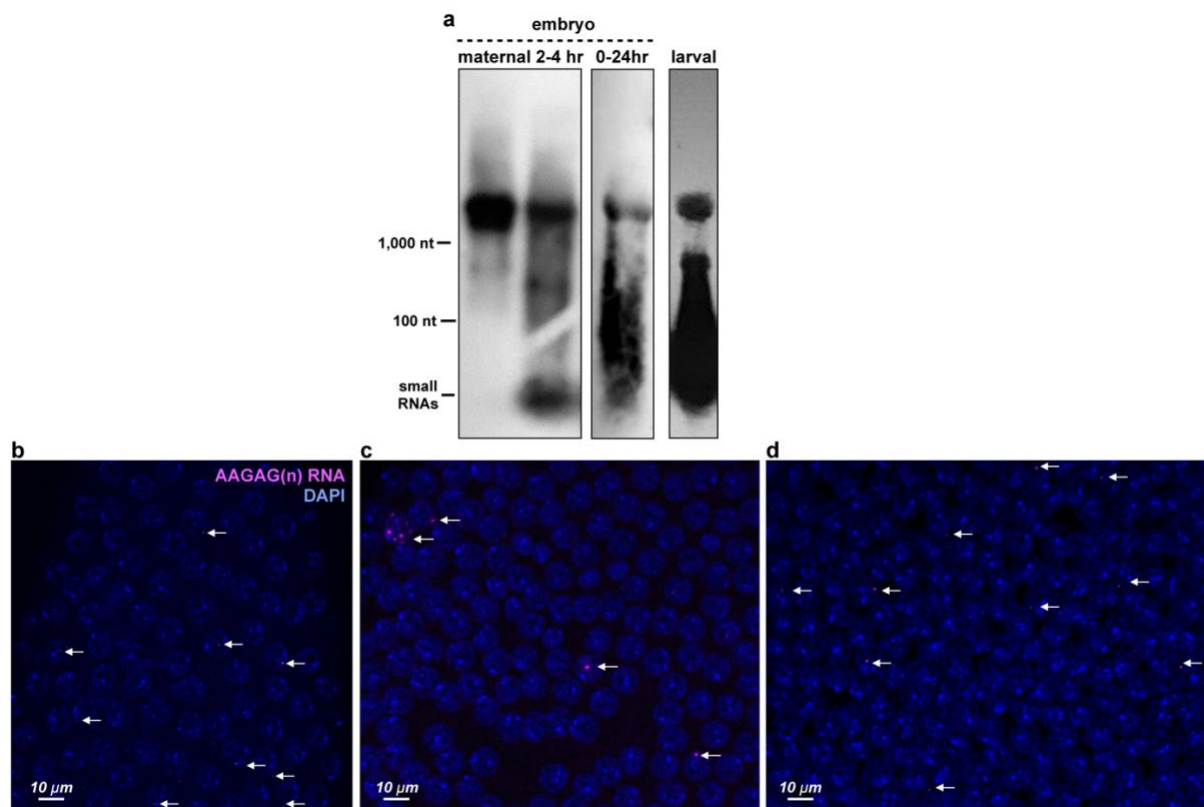

**Figure 1-figure supplement 2. AAGAG RNA is present throughout development and forms foci.** **a**, Northern blot analyzing RNA from Oregon R embryos and third instar larva hybridized with a probe complementary to AAGAG(n). Note that signal intensity is not a representation of relative AAGAG RNA levels since different exposure times were used. **b-d**, Examples of AAGAG RNA distributions in cycle 12, 13 and 14 embryos. Projections through embryo nuclei stained with DAPI (Blue). AAGAG RNA foci are shown in magenta and marked with arrows. **b**, One of the 33% of cycle 12 embryos with AAGAG RNA foci. **c**, One of the 67% of cycle 13 embryos with one or more foci **d**, Cycle 14 embryo in which 100% of embryos contain AAGAG(n) RNA.
