# Supplementary material for: RNA from a simple-tandem repeat is required for sperm maturation and male fertility in Drosophila melanogaster
Source: eLife journal article supplement (doi:10.7554/elife.48940), 2019-11-05
Supplement: supp [file elife-48940-supp-v1.zip]

**a**

| Repeat     | RNA-Foci? | Repeat         | RNA-Foci? |
|------------|-----------|----------------|-----------|
| AAACC(n)   | ND        | AGCC(n)        | ND        |
| AAACG(n)   | ND        | AGCCCC(n)      | ND        |
| AAAG(n)    | ND        | AGCCG(n)       | ND        |
| AACAG(n)   | ND        | AGCGG(n)       | ND        |
| AACGG(n)   | ND        | AGTCT(n)       | ND        |
| AATC(n)    | ND        | ATATC(n)       | ND        |
| AAGAGG(n)  | ND        | ATC(n)         | ND        |
| AAGCG(n)   | ND        | ATCGC(n)       | ND        |
| AAGGAG(n)  | ND        | ATTAC(n)*      | ND        |
| AATAG(n)   | ND        | dodeca         | ND        |
| AATAGAC(n) | ND        | AACAC(n)*      | +         |
| AATC(n)    | ND        | AATAC(n)*      | +         |
| AATT(n)    | ND        | 359 satellite* | +         |
| ACCC(n)    | ND        | AATAACATAG(n)  | +         |
| ACCCC(n)   | ND        | AAGAG(n)*      | +         |
| AGC(n)     | ND        |                |           |

**b**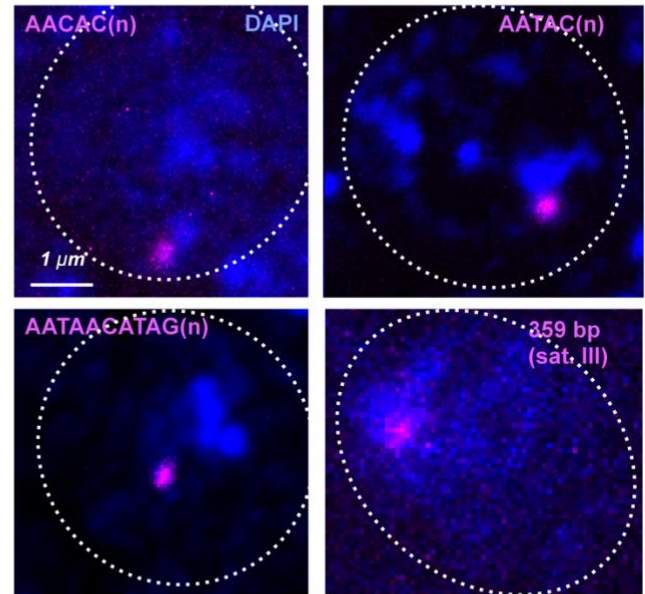

**Figure 1-figure supplement 1. RNA-FISH analysis of satellite RNAs in cycle 14 embryos. a**, ND=Not detected, \*repeats tested for expression from both strands. For more details about AAGAG RNA in cycle 14, see Fig. 1, A and E and Figure 1-figure supplement 2D. **b**, Projections of cycle 14 nuclei (dashed circle = nuclear periphery); DNA (DAPI)= blue, indicated satellite RNAs in magenta.
