# Supplementary material for: RNA from a simple-tandem repeat is required for sperm maturation and male fertility in Drosophila melanogaster
Source: eLife journal article supplement (doi:10.7554/elife.48940), 2019-11-05
Supplement: supp [file elife-48940-supp-v1.zip]

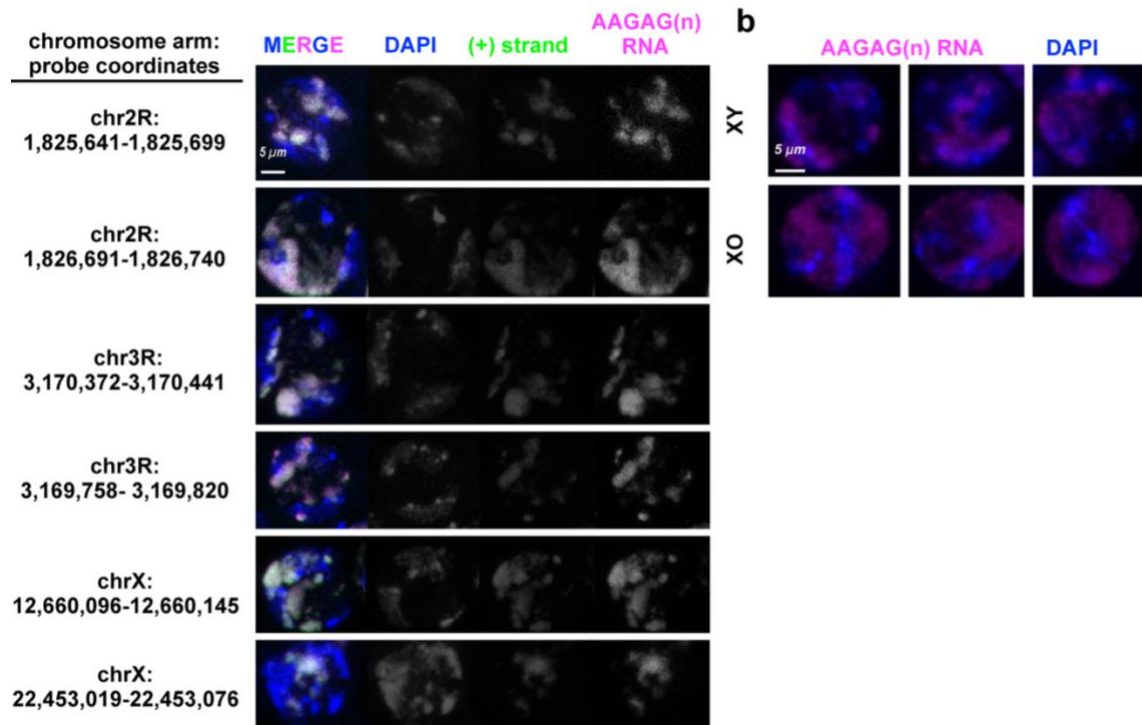

**Figure 2-figure supplement 2. Heterochromatic regions adjacent to AAGAG(n) or AG(n)-rich blocks are transcribed in primary spermatocytes, co-localize with AAGAG(n) RNA foci and do not come from the Y. a,** Projections of Oregon R S5 spermatocytes probed for unique regions of RNA (green) adjacent to AAGAG(n) (magenta) or AAGAG(n) containing AG rich blocks. DAPI (DNA) is indicated in blue. **b,** Projections of S5 spermatocyte probed to AAGAG RNA (magenta) imaged at same laser intensities in XY and XO genotypes. DNA is stained with DAPI (blue).
