# Supplementary material for: RNA from a simple-tandem repeat is required for sperm maturation and male fertility in Drosophila melanogaster
Source: eLife journal article supplement (doi:10.7554/elife.48940), 2019-11-05
Supplement: supp [file elife-48940-supp-v1.zip]

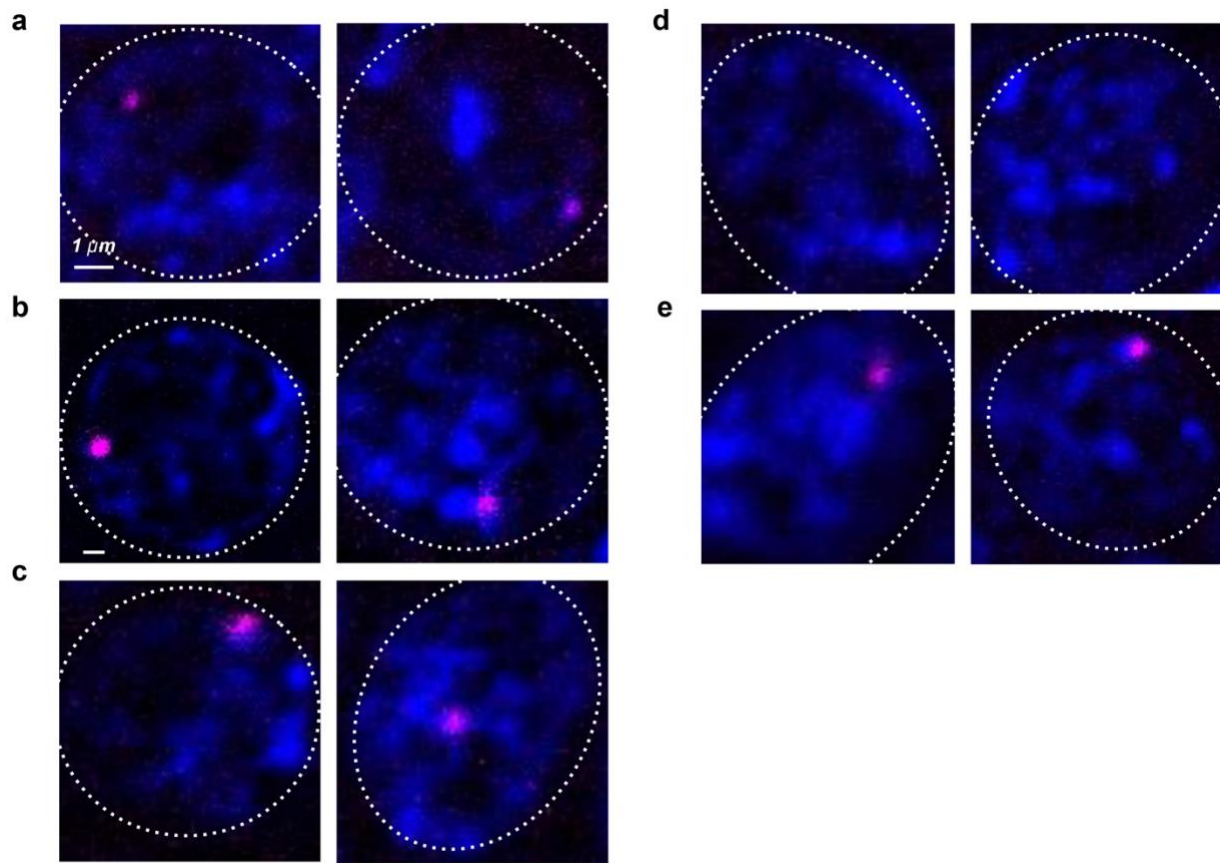

**Figure 1-figure supplement 3. AAGAG RNA foci contain single-stranded RNA and are not associated with R-loops.** Confocal sections of embryonic nuclei in cycle 14 (with exception of left panel in 'b'), nuclear periphery outlined in dotted circles. **a**, No RNase control. **b**, Treated with RNaseIII (left nucleus is cycle 12) **c**, RNaseH **d**, RNase1 and **e**, RNaseA
