# Supplementary material for: RNA from a simple-tandem repeat is required for sperm maturation and male fertility in Drosophila melanogaster
Source: eLife journal article supplement (doi:10.7554/elife.48940), 2019-11-05
Supplement: supp [file elife-48940-supp-v1.zip]

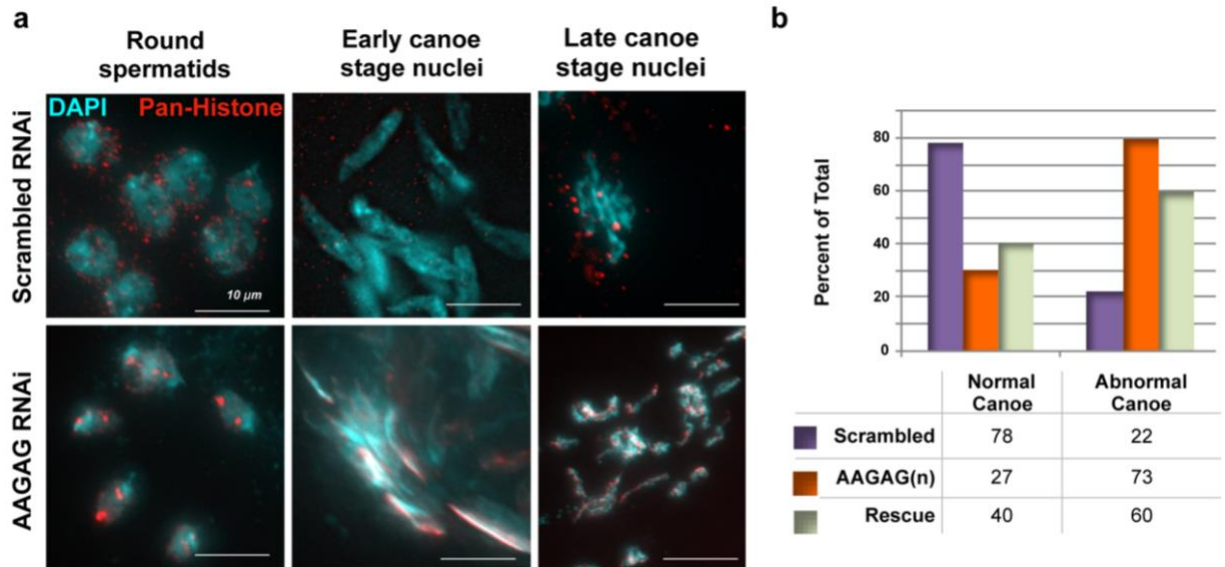

**Figure 3- figure supplement 1. Histones are retained and DNA morphology is altered in late canoe stage AAGAG RNAi testes.** **a**, Histones are retained until late canoe stage with AAGAG RNAi in primary spermatocytes but removed by early canoe stage in scrambled RNAi. **b**, Canoe stage nuclei exhibit abnormal morphology with AAGAG RNAi, and this morphology is partially restored with AAGAG(37) rescue.
